# Supplementary material for: Fine-tuning of the flowering time control in winter barley: the importance of HvOS2 and HvVRN2 in non-inductive conditions
Source: PubMed Central journal article supplement (PMC6434887; doi:10.1186/s12870-019-1727-9), 2019-03-25
Supplement: 12870_2019_1727_MOESM1_ESM.pdf [file 12870_2019_1727_MOESM1_ESM.pdf]

## **Supplementary data**

**Fine-tuning of the flowering time control in winter barley: the importance of *HvOS2* and *HvVRN2* in non-inductive conditions**

A Monteagudo, E Igartua, B Contreras-Moreira, MP Gracia, J Ramos, I Karsai, AM Casas

## Supplementary data

Table S1. Analysis of variance for the  $\Delta C_t$  corresponding to the expression of genes of 'Hispanic' and 'Barberousse' in 3-week-old plants...

Table S2. ANOVA of *HvVRN2* and *HvCO2* expression in 21 days-old plants of two varieties grown in absence of vernalization under natural photoperiods.

Table S3. Analysis of variance for the  $\Delta C_t$  corresponding to the expression of genes of 'Hispanic' and 'Barberousse' plants grown under natural photoperiods without vernalization, and sampled on a set date, with 15 h light...

Table S4. Analysis of variance for the  $\Delta C_t$  corresponding to the expression of genes of 'Hispanic' and 'Barberousse' in plants grown under 12 h light, with different vernalization treatments...

Table S5. Sequences of primers used in this work.

Figure S1. Flowering date under different vernalization treatments in the preliminary experiment...

Figure S2. Gene expression in 2-week-old plants sown under natural and increasing photoperiods (without vernalization and control)...

Figure S3. Percentage of reproductive apices with respect to the total (vegetative and reproductive) after 100 days of the experiment...

Figure S4. *HvVRN2* diurnal expression in 'Barberousse' unvernallized plants grown under LD (16 h light)...

Figure S5. Alignment of HvCO2, HvCO9 and HvOS2 proteins.

Table S1. Analysis of variance for the  $\Delta C_t$  corresponding to the expression of genes of 'Hispanic' and 'Barberousse' in 3-week-old plants under natural photoperiods without vernalization. Between 3 and 4 biological replicates per gene were used.

| Source of variation    | <i>HvVRN1</i> |       |    | <i>HvVRN2</i> |       |     | <i>HvCO2</i> |       |     | <i>PPD-H1</i> |      |    | <i>HvOS2</i> |       |     | <i>HvCO9</i> |        |     |
|------------------------|---------------|-------|----|---------------|-------|-----|--------------|-------|-----|---------------|------|----|--------------|-------|-----|--------------|--------|-----|
|                        | df            | ms    |    | df            | ms    |     | df           | ms    |     | df            | ms   |    | df           | ms    |     | df           | ms     |     |
| Variety                | 1             | 1.68  | ns | 1             | 25.18 | **  | 1            | 0.62  | ns  | 1             | 0.78 | ns | 1            | 30.94 | *** | 1            | 5.85   | ns  |
| Sowing event           | 8             | 15.15 | ns | 8             | 15.92 | *** | 8            | 16.21 | *** | 8             | 1.18 | *  | 8            | 2.24  | *   | 8            | 149.06 | *** |
| Variety * Sowing event | 8             | 8.75  | ns | 8             | 3.05  | ns  | 8            | 2.77  | ns  | 8             | 1.15 | *  | 8            | 1.38  | ns  | 8            | 31.37  | ns  |
| Residuals              | 34            | 9.30  |    | 34            | 2.05  |     | 35           | 2.20  |     | 51            | 0.43 |    | 35           | 0.81  |     | 35           | 90.20  |     |

\*, \*\*, \*\*\* significant effects at  $P < 0.05$ ,  $< 0.01$ ,  $< 0.001$

Table S2. ANOVA of A) *HvVRN2* and B) *HvCO2* expression in 21 days-old plants of two varieties grown in absence of vernalization under natural photoperiods. Plants were sown sequentially from Feb 11<sup>th</sup> to Apr 8<sup>th</sup> (sowing events 1-9). For this analysis, the nine sowing events were grouped as 1-4 (shorter photoperiod) and 5-9 (longer photoperiod), with the threshold at 12h 30m as the splitting point. This subfactor was named “Group”. We subdivided the differences between sowing events and the interaction between sowing events and variety in two components: the variance due to the differences between the two groups and the variance due to differences between sowing events within groups.

| <b>A) <i>HvVRN2</i></b> | Degrees of freedom | Sum of squares | Mean squares | F value | Pr(>F)   |     |
|-------------------------|--------------------|----------------|--------------|---------|----------|-----|
| Source of variation     |                    |                |              |         |          |     |
| Variety                 | 1                  | 25.18          | 25.18        | 12.28   | 0.0013   | **  |
| Sowing event (Sowing)   | 8                  | 127.36         | 15.92        | 7.77    | 7.17E-06 | *** |
| Group                   | 1                  | 99.36          | 99.36        | 48.47   | 5.00E-08 | *** |
| Within group            | 7                  | 28.00          | 4.00         | 1.95    | 0.0916   |     |
| Variety * Sowing        | 8                  | 24.43          | 3.05         | 1.49    | 0.1976   |     |
| Variety * Group         | 1                  | 4.93           | 4.93         | 2.40    | 0.1303   |     |
| Variety * within group  | 7                  | 19.50          | 2.79         | 1.36    | 0.2542   |     |
| Residuals               | 34                 | 69.70          | 2.05         |         |          |     |

\*, \*\*, \*\*\* significant effects at  $P < 0.05$ ,  $< 0.01$ ,  $< 0.001$

| <b>B) <i>HvCO2</i></b> | Degrees of freedom | Sum of squares | Mean squares | F value | Pr(>F)   |     |
|------------------------|--------------------|----------------|--------------|---------|----------|-----|
| Source of variation    |                    |                |              |         |          |     |
| Variety                | 1                  | 0.62           | 0.62         | 0.28    | 0.599    |     |
| Sowing event (Sowing)  | 8                  | 129.64         | 16.21        | 7.35    | 1.07E-05 | *** |
| Group                  | 1                  | 17.74          | 17.74        | 8.05    | 0.00752  | **  |
| Within group           | 7                  | 111.90         | 15.99        | 7.25    | 2.23e-05 | *** |
| Variety * Sowing       | 8                  | 22.19          | 2.77         | 1.26    | 0.296    |     |
| Variety * Group        | 1                  | 0.25           | 0.25         | 0.12    | 0.736    |     |
| Variety * within group | 7                  | 21.93          | 3.13         | 1.42    | 0.228    |     |
| Residuals              | 35                 | 77.14          | 2.20         |         |          |     |

\*, \*\*, \*\*\* significant effects at  $P < 0.05$ ,  $< 0.01$ ,  $< 0.001$

Table S3. Analysis of variance for the  $\Delta C_t$  corresponding to the expression of genes of 'Hispanic' and 'Barberousse' plants grown under natural photoperiods without vernalization, and sampled on a set date, with 15 h light. Between 3 and 4 biological replicates per gene were used.

| Source of variation    | <i>HvVRN1</i> |           | <i>HvVRN2</i> |          | <i>HvCO2</i> |         | <i>PPD-H1</i> |          | <i>HvOS2</i> |            | <i>HvCO9</i> |          | <i>HvFT1</i> |           |
|------------------------|---------------|-----------|---------------|----------|--------------|---------|---------------|----------|--------------|------------|--------------|----------|--------------|-----------|
|                        | df            | ms        | df            | ms       | df           | ms      | df            | ms       | df           | ms         | df           | ms       | df           | ms        |
| Variety                | 1             | 179.0 *   | 1             | 33.92 ** | 1            | 23.03 * | 1             | 1.99 ns  | 1            | 103.11 *** | 1            | 3.73 ns  | 1            | 176.9 *** |
| Sowing event           | 6             | 213.5 *** | 6             | 2.87 ns  | 6            | 2.34 ns | 6             | 3.82 *** | 6            | 36.94 ***  | 6            | 10.51 ns | 6            | 93.3 ***  |
| Variety * Sowing event | 6             | 119.7 **  | 6             | 2.55 ns  | 6            | 8.44 ns | 6             | 1.54 *   | 6            | 10.2 ns    | 6            | 13.88 ns | 6            | 13.3 ns   |
| Residuals              | 40            | 28.1      | 40            | 2.92     | 26           | 4.31    | 26            | 0.54     | 29           | 5.93       | 33           | 7.04     | 30           | 10.9      |

\*, \*\*, \*\*\* significant effects at  $P < 0.05$ ,  $< 0.01$ ,  $< 0.001$

Table S4. Analysis of variance for the  $\Delta C_t$  corresponding to the expression of genes of 'Hispanic' and 'Barberousse' in plants grown under 12 h light, with different vernalization treatments (0, 14 and 28 days). Between 3 and 4 biological replicates per gene were used.

| Source of variation     | <i>HvVRN1</i> |           | <i>HvVRN2</i> |           | <i>HvCO2</i> |         | <i>PPD-H1</i> |          | <i>HvOS2</i> |           | <i>HvCO9</i> |           | <i>HvFT1</i> |           |
|-------------------------|---------------|-----------|---------------|-----------|--------------|---------|---------------|----------|--------------|-----------|--------------|-----------|--------------|-----------|
|                         | df            | ms        | df            | ms        | df           | ms      | df            | ms       | df           | ms        | df           | ms        | df           | ms        |
| Variety                 | 1             | 222.2 *** | 1             | 116.5 *** | 1            | 4.8 ns  | 1             | 0.44 ns  | 1            | 102.8 *** | 1            | 139.4 *** | 1            | 6.2 ns    |
| Vernalization           | 2             | 181.5 *** | 2             | 134.3 *** | 2            | 52.6 ** | 2             | 1.72 **  | 2            | 2.1 ns    | 2            | 26.3 ***  | 2            | 53.4 **   |
| Age                     | 3             | 61.3 ***  | 3             | 7.9 **    | 3            | 40.0 *  | 3             | 4.55 *** | 3            | 5.4 ns    | 3            | 71.6 ***  | 3            | 140.2 *** |
| Variety * Vernalization | 2             | 88.6 ***  | 2             | 64.6 ***  | 2            | 9.6 ns  | 2             | 0.69 ns  | 2            | 7.2 ns    | 2            | 17.9 **   | 2            | 7.8 ns    |
| Variety * Age           | 3             | 3.4 ns    | 3             | 1.0 ns    | 3            | 10.1 ns | 3             | 0.21 ns  | 3            | 1.0 ns    | 3            | 1.7 ns    | 3            | 10.3 ns   |
| Vernalization * Age     | 6             | 5.9 ns    | 6             | 12.4 ***  | 6            | 6.5 ns  | 6             | 0.88 ns  | 6            | 3.2 ns    | 6            | 9.7 **    | 6            | 18.6 ns   |
| Variety * Ver * Age     | 6             | 11.1 **   | 6             | 2.4 ns    | 6            | 10.8 ns | 6             | 1.05 ns  | 6            | 1.7 ns    | 6            | 18.5 ***  | 6            | 16.7 ns   |
| Residuals               | 48            | 2.6       | 48            | 1.4       | 47           | 14.1    | 48            | 0.53     | 48           | 2.8       | 48           | 2.9       | 49           | 10.4      |

\*, \*\*, \*\*\* significant effects at  $P < 0.05$ ,  $< 0.01$ ,  $< 0.001$

Table S5. Primer sequences for gene expression assay and sequencing.

### Gene expression

| Gene                       | Primer sequence (5'-3')                                           | Reference                  |
|----------------------------|-------------------------------------------------------------------|----------------------------|
| <i>HvCO2</i> <sup>b</sup>  | Forward: CATCACTTGTGACCCAAGACC<br>Reverse: CTATAGTTCCATAATTGCTCC  | [1]                        |
| <i>HvCO9</i> <sup>a</sup>  | Forward: AAGCTGATGCGGTACAAAGAGA<br>Reverse: GAACCACCCGAGGTCGAG    | [2]                        |
| <i>HvFT1</i> <sup>a</sup>  | Forward: ATCTCCACTGGTTGGTGACAGA<br>Reverse: TTGTAGAGCTCGGCAAAGTCC | [3]                        |
| <i>HvFT3</i> <sup>b</sup>  | Forward: GGTTGTGGCTCATGTTATGC<br>Reverse: CTACTIONCCTTGAGAACTTTC  | Forward: [4]; Reverse: [5] |
| <i>HvOS2</i> <sup>a</sup>  | Forward: CAATGCTGATGACTCAGATGCT<br>Reverse: CGCTATTTTCGTTGCGCCAAT | [6]                        |
| <i>Ppd-H1</i> <sup>b</sup> | Forward: CAAATCAAAGAGCGGCGATC<br>Reverse: TCTGACTTGGGATGGTTCACA   | [7]                        |
| <i>HvVRN1</i> <sup>a</sup> | Forward: TATGAGCGCTACTCTTATGC<br>Reverse: TGAAGCTCAGAAATGGATTTCG  | [8]                        |
| <i>HvVRN2</i> <sup>a</sup> | Forward: GAGCCACCATCGTGCCATTC<br>Reverse: GCCGCTTCTTCCTCTTCTC     | [8]                        |
| <i>Actin</i>               | Forward: GCCGTGCTTTCCCTCTATG<br>Reverse: GCTTCTCCTTGATGTCCCTTA    | [8]                        |

### Sequencing

| Gene         | Primer sequence (5'-3')   | Length (bp) | Region                |
|--------------|---------------------------|-------------|-----------------------|
| <i>HvCO2</i> | <b>Morex_contig_6805</b>  |             |                       |
| CO2.1F       | TTTTCGCTCACTGGATTCCAC     | 983         | 5' UTR, exon 1        |
| CO2.2R       | GCCTTGAAGTGGTACGAACTC     |             |                       |
| CO2.7F       | GCAAGGGAGCAATTATGGAA      | 988         | Exon1, intron, exon 2 |
| CO2.8R       | GTGGTGACAGCATGTGGTTC      |             |                       |
| CO2.5F       | TAGTACCGGACAACACCAGAC     | 782         | Exon 2, 3' UTR        |
| CO2.6R       | TCCCCAAGAAGTGTGTATCCA     |             |                       |
| <i>HvCO9</i> | <b>Morex_contig_67944</b> |             |                       |
| CO9.1F       | ACGTAAGGAACCCTCCCATC      | 996         | 5'UTR, exon 1         |

|                     |                         |     |                          |
|---------------------|-------------------------|-----|--------------------------|
| CO9.2R              | TAACAATTTGCACCACACGC    |     |                          |
| CO9.3F              | AGTTCCAGTTCTTCGGGCAG    | 783 | Exon 1, intron           |
| CO9.4R              | ATTACTAGTGTGGGCCGAGG    |     |                          |
| CO9.5F              | CAAATATTTCTGCGTGTGGTGC  | 949 | Intron                   |
| CO9.6R              | CGTTTCTCTCCCGCAATAAGG   |     |                          |
| CO9.7F              | TTCGAAATGCCATGCTCTTCC   | 910 | Exon 2, 3'UTR            |
| CO9.8R              | CCGCCCCACCTCAATTTATTT   |     |                          |
| <b><i>HvOS2</i></b> | <b>HORVU3Hr1G095240</b> |     |                          |
| OS2.1F              | TTTTTCACAGCGTGGATAAAGG  | 936 | 5'UTR, exon 1,<br>intron |
| OS2.2R              | TTGGCCGTGACAATAATAAGC   |     |                          |
| OS2.3F              | CCGGTAAATCAAGGCTGCTC    | 829 | Intron 1, partial        |
| OS2.4R              | GCACAACAAACTCTCGGTGA    |     |                          |
| OS2.5F              | ATTTCCAGCAGAGCCTAAAGC   | 918 | Exon2-exon 4             |
| OS2.6R              | TGAAAATGGCCAAAACAGAGC   |     |                          |
| OS2.7F              | ACTTCCTGGTAGCCCTTGAG    | 854 | Exon 4, intron 4         |
| OS2.8R              | ACAACAGAGCCA ACTTGTCG   |     |                          |
| OS2.9F              | CTTAGTTGCTGCAGTCTCACTC  | 877 | Intron 4, exon 5         |
| OS2.10R             | TACCAAATGCATGCACATCACA  |     |                          |
| OS2.11F             | AGAGCCTGGCATGAGAGTTC    | 855 | Exon 5, 3'UTR            |
| OS2.12R             | CCCAGGGAAGACACTTGCTA    |     |                          |

<sup>a</sup> For these genes, each reaction contained 10  $\mu$ l of SYBR Green Master Mix (Applied Biosystems), 0.2  $\mu$ M of each primer and 250 ng of cDNA in a volume of 20  $\mu$ l. Reactions were run with the following conditions: 10 min at 95°C, 44 cycles of 15 s at 95°C and 1 min at 60°C, followed by a melting curve program (60-95°C) implying temperature increases of 1°C each minute.

<sup>b</sup> For these genes, each reaction contained 5  $\mu$ l of PowerUp SYBR Green Master Mix (Applied Biosystems), 0.2  $\mu$ M of each primer and 250 ng of cDNA in a volume of 10  $\mu$ l. Reactions were run with the following conditions: 2 min at 50°C, 2 min at 95°C, 44 cycles of 15 s at 95°C, 15 s at 60°C and 45 s at 75°C, and a melting curve program (60-95°C) of 1°C of temperature increment for each minute.



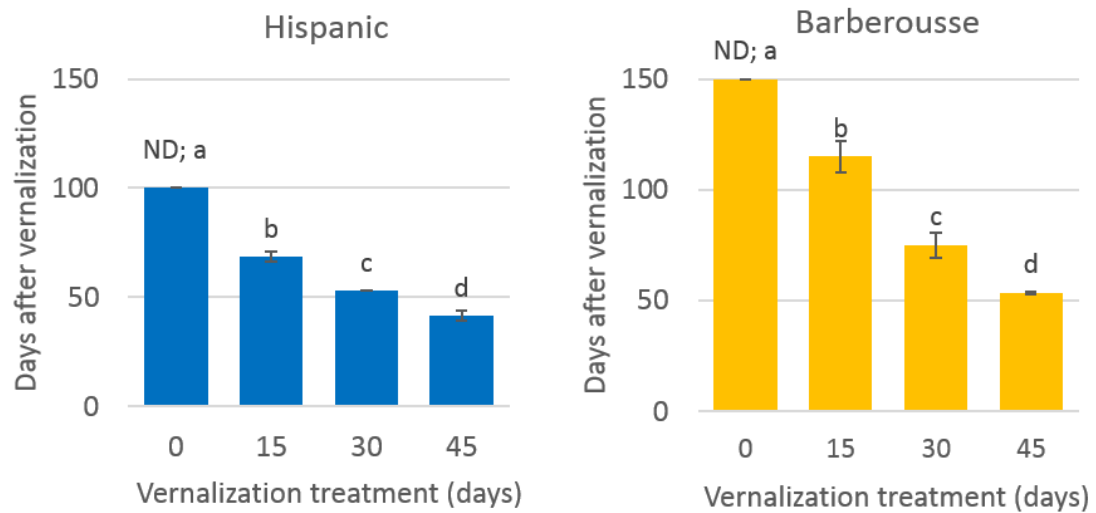

Figure S1. Flowering date under different vernalization treatments. Both varieties, 'Hispanic' and 'Barberousse', were studied independently. Hispanic's experiment ended after 100 days, whereas Barberousse's experiment ended 150 days after starting. ND: not determined. For each vernalization treatment, bars with different letter are significantly different at  $P < 0.05$  (LSD test).

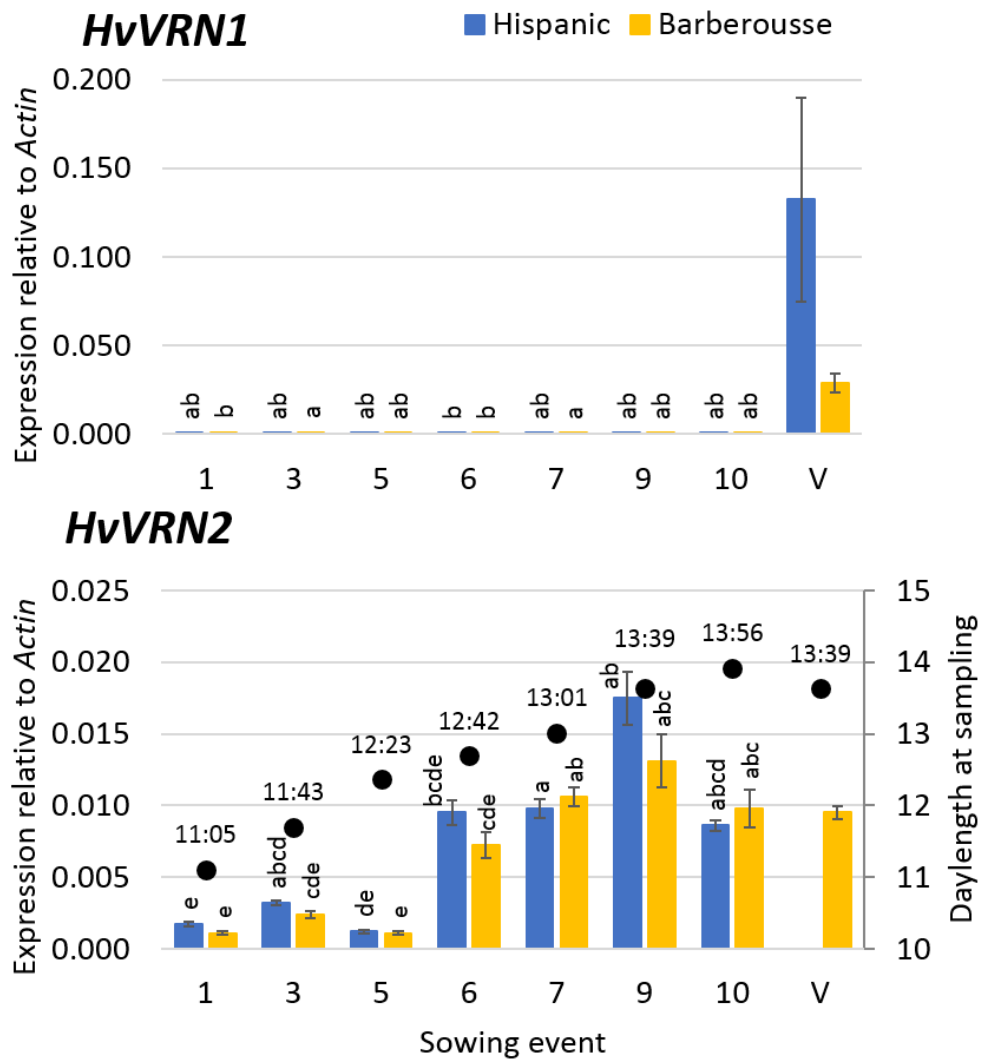

Figure S2. Gene expression in 2-week-old plants sown under natural and increasing photoperiod (without vernalization and control). X-axis represents the successive sowings, from 11th February until April 15th. Unvernalized plants (sowings 1 to 10) and vernalized control (V) of ‘Hispanic’ (blue) and ‘Barberousse’ (yellow). Black dots denote day-length at sampling date (labels in HH:MM). Mean of 3 biological replicates. Error bars are SEM. For each NV time-point, bars with the same letter are not significantly different at  $P < 0.05$  according to ANOVA that included genotypes and all sampling times.

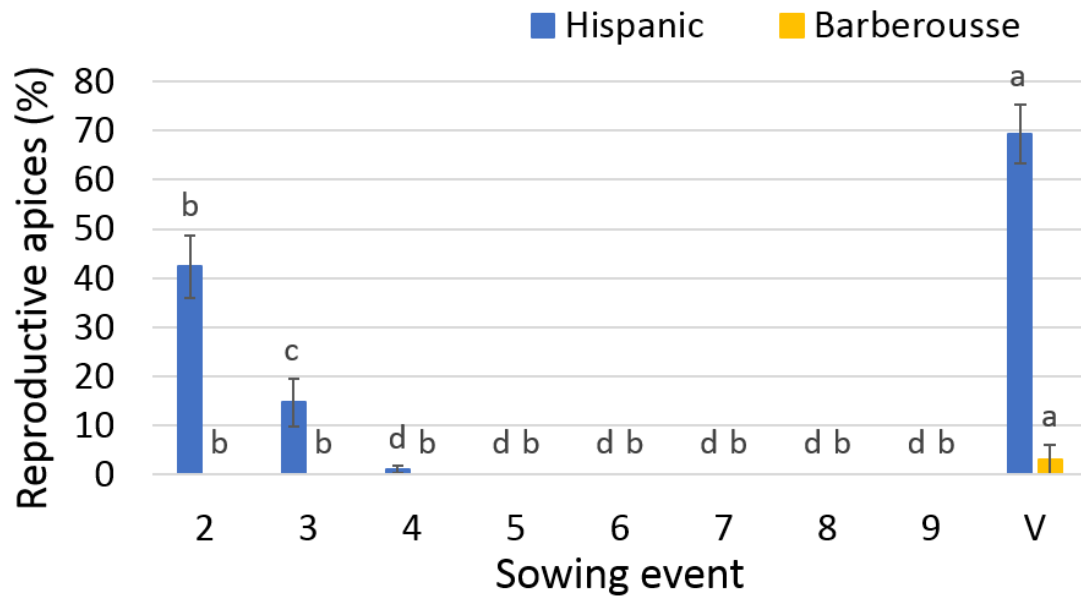

Figure S3. Percentage of reproductive apices with respect to the total (vegetative and reproductive) after 100 days of the experiment. Mean of 10-12 plants. Error bars are SD. For each variety, bars with the same letter are not significantly different at  $P < 0.05$  (LSD test).

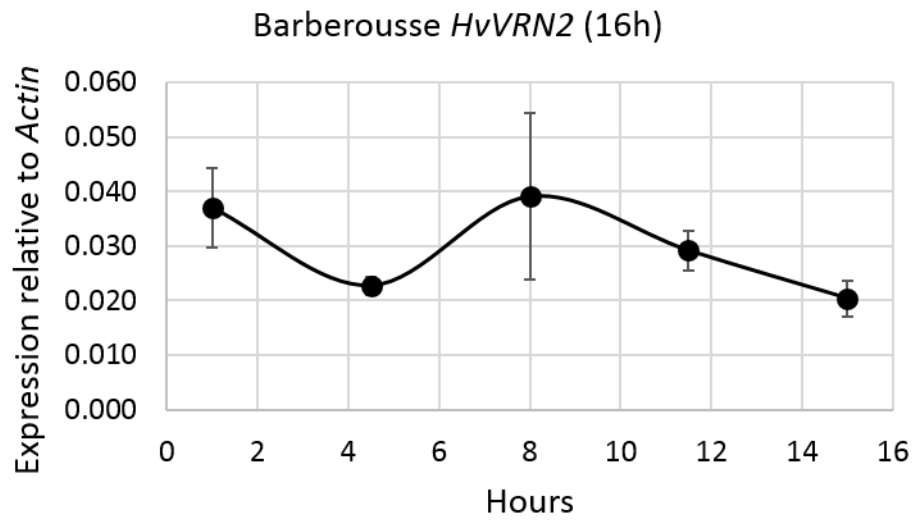

Figure S4. *HvVRN2* diurnal expression in ‘Barberousse’ unvernialized plants grown under LD (16 h light). Samples were taken at 1, 4.5, 8, 11.5 and 15 h since the start of the light period. Error bars represent standard error of mean of three biological replicates.

# A) HvCO2

Morex\_AF490470 MNCNFNSDLLEKEAGRTSFPWARPCDGCCHAAPSAVYCCADAAAYLCSSCDTQVHSANRVAS  
Igri\_AF490469 MNCNFNSDLLEKEAGRTSFPWARPCDGCCHAAPSAVYCCADAAAYLCSSCDTQVHSANRVAS  
Barberousse\_HvCO2 MNCNFNSDLLEKEAGRTSFPWARPCDGCCHAAPSAVYCCADAAAYLCSSCDTQVHSANRVAS  
Hispanic\_HvCO2 MNCNFNSDLLEKEAGRTSFPWARPCDGCCHAAPSAVYCCADAAAYLCSSCDTQVHSANRVAS  
\*\*\*\*\*

## B-box domain (1)

Morex\_AF490470 RHERVRCETCESTPAVLACHADAAALCTACDAQVHSANPIAQRHQRVFVLPVLPVAI PA  
Igri\_AF490469 RHERVRCETCESTPAVLACHADAAALCTACDAQVHSANPIAQRHQRVFVLPVLPVAI PA  
Barberousse\_HvCO2 RHERVRCETCESTPAVLACHADAAALCTACDAQVHSANPIAQRHQRVFVLPVLPVAI PA  
Hispanic\_HvCO2 RHERVRCETCESTPAVLACHADAAALCTACDAQVHSANPIAQRHQRVFVLPVLPVAI PA  
\*\*\*\*\*

## (1) B-box domain (2)

Morex\_AF490470 ASGFAEAEASVTAHGDKEGGEEVDSWLLRRNSDDNNCANKIDRYFNLVGYNMYDNI TCD  
Igri\_AF490469 ASGFAEAEASVTAHGDKEGGEEVDSWLLRRNSDDNNCANKIDRYFNLVGYNMYDNI TCD  
Barberousse\_HvCO2 ASGFAEAEASVTAHGDKEGGEEVDSWLLRRNSDDNNCANKIDRYFNLVGYNMYDNI TCD  
Hispanic\_HvCO2 ASGFAEAEASVTAHGDKEGGEEVDSWLLRRNSDDNNCANKIDRYFNLVGYNMYDNI TCD  
\*\*\*\*\*

Morex\_AF490470 PRPQEYRMQEQQHVQNRNRYREKEGCECVVPPQVVMASEQQGSNYGTIGAGQAASVTAMAS  
Igri\_AF490469 PRPQEYRMQEQQHVQNRNRYREKEGCECVVPPQVVMASEQQGSNYGTIGAGQAASVTAMAS  
Barberousse\_HvCO2 PRPQEYRMQEQQHVQNRNRYREKEGCECVVPPQVVMASEQQGSNYGTIGAGQAASVTAMTS  
Hispanic\_HvCO2 PRPQEYRMQEQQHVQNRNRYREKEGCECVVPPQVVMASEQQGSNYGTIGAGQAASVTAMTS  
\*\*\*\*\*

Morex\_AF490470 TYTASISNDISFSSMEVGIVPDNTRPNISNRNILTSSEAIELSGHSLQMPVHFSMDREA  
Igri\_AF490469 TYTASISNDISFSSMEVGIVPDNTRPNISNRNILTSSEAIELSGHSLQMPVHFSMDREA  
Barberousse\_HvCO2 TYTASISNDISFSSMEVGIVPDNTRPNISNRNILTSSEAIELSGHSLQMPVHFSMDREA  
Hispanic\_HvCO2 TYTASISNDISFSSMEVGIVPDNTRPNISNRNILTSSEAIELSGHSLQMPVHFSMDREA  
\*\*\*\*\*

Morex\_AF490470 RVLRYKEKKQARKFQKTIRYATRKAYAEARPRIKGRFAKRSIEHEENHMLSPPALPDT S  
Igri\_AF490469 RVLRYKEKKQARKFQKTIRYATRKAYAEARPRIKGRFAKRSIEHEENHMLSPPALPDT S  
Barberousse\_HvCO2 RVLRYKEKKQARKFQKTIRYATRKAYAEARPRIKGRFAKRSIEHEENHMLSPPALPDT S  
Hispanic\_HvCO2 RVLRYKEKKQARKFQKTIRYATRKAYAEARPRIKGRFAKRSIEHEENHMLSPPALPDT S  
\*\*\*\*\*

## CCT domain

Morex\_AF490470 SYNTVPWF  
Igri\_AF490469 SYNTVPWF  
Barberousse\_HvCO2 SYNTVPWF  
Hispanic\_HvCO2 SYNTVPWF  
\*\*\*\*\*

## B) HvCO9

|                   |                                                               |
|-------------------|---------------------------------------------------------------|
| Barberousse_HvCO9 | MSAASGAACRVCGGGSEDCSCLLQRGRGVAAARCGVADLNRGFFGMFGQAEEPAAVDVV   |
| Steptoe_AB592331  | MSAASGAACRVCGGGSEDCSCLLQRGRGVAAARCGVADLNRGFFGMFGQAEEPAAVDVV   |
| Hispanic_HvCO9    | MSAASGAACRVCGGGSEDCSCLLQRGRGVAAARCGVADLNRGFFGMFGQAEEPAAVDVV   |
| Morex_AB592332    | MSAASGAACRVCGGGSEDCSCLLQRGRGVAAARCGVADLNRGFFGMFGQAEEPAAVDVV   |
|                   | *****                                                         |
| Barberousse_HvCO9 | SGGGGAAAVGLQEFQFFGQEDHESVAWLFDNDHAPIGGEDRLQHRSAVTEQLQRRQAFDAY |
| Steptoe_AB592331  | SGGGGAAAVGLQEFQFFGQEDHESVAWLFDNDHAPIGGEDRLQHRSAVTEQLQRRQAFDAY |
| Hispanic_HvCO9    | SGGGGAAAVGLQEFQFFGQEDHESVAWLFDNDHAPIGGEDRLQHRSAVTEQLQRRQAFDAY |
| Morex_AB592332    | SGGGGAAAVGLQEFQFFGQEDHESVAWLFDNDHAPIGGEDRLQHRSAVTEQLQRRQAFDAY |
|                   | *****                                                         |
| Barberousse_HvCO9 | AEYQPGHGLTFDVPVPVPLSRDVVDTAILGLGGNPVTSAAITMPYCGRETLTFTEAAAS   |
| Steptoe_AB592331  | AEYQPGHGLTFDVPVPVPLSRDVVDTAILGLGGNPVTSAAITMPYCGRETLTFTEAAAS   |
| Hispanic_HvCO9    | AEYQPGHGLTFDVPVPVPLSRDVVDTAILGLGGNPVTSAAITMPYCGRETLTFTEAAAS   |
| Morex_AB592332    | AEYQPGHGLTFDVPVPVPLSRDVVDTAILGLGGNPVTSAAITMPYCGRETLTFTEAAAS   |
|                   | *****                                                         |
| Barberousse_HvCO9 | SVVDPNDTAAAGLANGGAYSAGPSGGGGVVDVPAPELREAKLMRYEKRKRREYKQI      |
| Steptoe_AB592331  | SVVDPNDTAAAGLANGGAYSAGPSGGGGVVDVPAPELREAKLMRYEKRKRREYKQI      |
| Hispanic_HvCO9    | SVVDPNDTAAAGLANGSAYSAGPSGGGGVVDVPAPELREAKLMRYEKRKRREYKQI      |
| Morex_AB592332    | SVVDPNDTAAAGLANGSAYSAGPSGGGGVVDVPAPELREAKLMRYEKRKRREYKQI      |
|                   | *****                                                         |
|                   | CCT domain (continued)                                        |
| Barberousse_HvCO9 | RYASRKAYAEMRPRVKGRFAKVPDGGEGAAPSPQQPTQAAGYEPSRLDLGWFRS        |
| Steptoe_AB592331  | RYASRKAYAEMRPRVKGRFAKVPDGGEGAAPSPQQPTQAAGYEPSRLDLGWFRS        |
| Hispanic_HvCO9    | RYASRKAYAEMRPRVKGRFAKVPDGGEGAAPSPQQPTQAAGYEPSRLDLGWFRS        |
| Morex_AB592332    | RYASRKAYAEMRPRVKGRFAKVPDGGEGAAPSPQQPTQAAGYEPSRLDLGWFRS        |
|                   | *****                                                         |
|                   | CCT domain                                                    |

## C) HvOS2

|                          |                                                             |
|--------------------------|-------------------------------------------------------------|
| Morex_HORVU3Hr1G095240.6 | MARRGRVELRRIEDRTSRQVRFKRRSGLFKKAFELSVLCAEVALLVFSPAGRLYEYAS  |
| Hispanic_HvOS2           | MARRGRVELRRIEDRTSRQVRFKRRSGLFKKAFELSVLCAEVALLVFSPAGRLYEYAS  |
| Barberousse_HvOS2        | MARRGRVELRRIEDRTSRQVRFKRRSGLFKKAFELSVLCAEVALLVFSPAGRLYEYAS  |
| Zangqing320              | MARRGRVELRRIEDRTSRQVRFKRRSGLFKKAFELSVLCAEVALLVFSPAGRLYEYAS  |
| Igri_HM130526            | MARRGRVELRRIEDRTSRQVRFKRRSGLFKKAFELSVLCAEVALLVFSPAGRLYEYAS  |
|                          | *****                                                       |
|                          | MADS-box domain (continued)                                 |
| Morex_HORVU3Hr1G095240.6 | SSIEGTYDRYQAFAGAGKDVSEGGASNNNDGPSNIQSRLKIDITSWSLQNNADSDANEL |
| Hispanic_HvOS2           | SSIEGTYDRYQAFAGAGKDVSEGGASNNNDGPSNIQSRLKIDITSWSLQNNADSDANEL |
| Barberousse_HvOS2        | SSIEGTYDRYQAFAGAGKDVSEGGASNNNDGPSNIQSRLKIDITSWSLQNNADSDANEL |
| Zangqing320              | SSIEGTYDRYQAFAGAGKDVSEGGASNNNDGPSNIQSRLKIDITSWSLQNNADSDANEL |
| Igri_HM130526            | SSIEGTYDRYQAFAGAGKDVSEGGASNNNDGPSNIQSRLKIDITSWSLQNNADSDANEL |
|                          | **** *                                                      |
|                          | MADS-box domain                                             |
| Morex_HORVU3Hr1G095240.6 | VKLEKLLTDALKKTKSKKILAQRNSGAGTASGENSRRF                      |
| Hispanic_HvOS2           | VKLEKLLTDALKKTKSKKILAQRNSGAGTASGENSRRF                      |
| Barberousse_HvOS2        | VKLEKLLTDALKKTKSKKILAQRNSGAGTASGENSRRF                      |
| Zangqing320              | VKLEKLLTDALKKTKSKKILAQRNSGAGTASGENSRRF                      |
| Igri_HM130526            | VKLEKLLTDALKKTKSKKILAQRNSGAGTASGENSRRF                      |
|                          | *****                                                       |

Figure S5. Alignments of (A) HvCO<sub>2</sub>, (B) HvCO<sub>9</sub>, and (C) HvOS<sub>2</sub> predicted proteins. Protein domains for HvCO<sub>2</sub> [10]; HvCO<sub>9</sub> [Prosites v20.79 (<http://prosite.expasy.org/>)], and HvOS<sub>2</sub> [6] are indicated.

## References

1. Griffiths S, Dunford RP, Coupland G, Laurie DA. The Evolution of *CONSTANS*-Like Gene Families in Barley, Rice, and Arabidopsis. *Plant Physiol.* 2003;131 April:1855–67.
2. Kikuchi R, Kawahigashi H, Oshima M, Ando T, Handa H. The differential expression of *HvCO9*, a member of the *CONSTANS*-like gene family, contributes to the control of flowering under short-day conditions in barley. *J Exp Bot.* 2012;63:773–84.
3. Yan L, Fu D, Li C, Blechl a, Tranquilli G, Bonafede M, et al. The wheat and barley vernalization gene *VRN3* is an orthologue of *FT*. *Proc Natl Acad Sci.* 2006;103:19581–6.
4. Kikuchi R, Kawahigashi H, Ando T, Tonooka T, Handa H. Molecular and functional characterization of PEBP genes in barley reveal the diversification of their roles in flowering. *Plant Physiol.* 2009;149:1341–53.
5. Faure S, Higgins J, Turner A, Laurie DA. The *FLOWERING LOCUS T*-like gene family in barley (*Hordeum vulgare*). *Genetics.* 2007;176:599–609.
6. Greenup AG, Sasani S, Oliver SN, Talbot MJ, Dennis ES, Hemming MN, et al. *ODDSOC2* is a MADS box floral repressor that is down-regulated by vernalization in temperate cereals. *Plant Physiol.* 2010;153:1062–73.
7. Hemming MN, Peacock WJ, Dennis ES, Trevaskis B. Low-temperature and daylength cues are integrated to regulate *FLOWERING LOCUS T* in barley. *Plant Physiol.* 2008;147:355–66.
8. Trevaskis B, Hemming MN, Peacock WJ, Dennis ES. *HvVRN2* responds to daylength, whereas *HvVRN1* is regulated by vernalization and developmental status. *Plant Physiol.* 2006;140:1397–405.
9. Waddington SR, Cartwright PM. A quantitative Scale of Spike Initial and Pistil Development in Barley and Wheat. *Ann Bot.* 1983;51:119–30.
10. Cockram J, Thiel T, Steuernagel B, Stein N, Taudien S, Bailey PC, et al. Genome Dynamics Explain the Evolution of Flowering Time CCT Domain Gene Families in the Poaceae. *PLoS One.* 2012;7:e45307.
